# Supplementary material
Source: PubMed Central journal article supplement (PMC130632)
Supplement: pnas_202474599_6.pdf [file pnas_202474599_6.pdf]

OsPT13 ----MAGNQQLRVLHALDIARTQLYHFIAIIVIAGMGFFTDAYDLFSISLVADLLGHVYYY  
OsPT11 ----MADADGGSNLAVLDALDSARTQMYHMKAIIVIAGMGFFTDAYDLFCISTVSKLLGRLYYQ  
AT5g43340 ----MANEEQGSILKALDVAKTQWYHVTAVVSGMGFFTDSDYDLFVISLITKLLGRYYQ  
At2g32830 ----MAKKGKEVLNALDAKTQMYHFTAIVIAGMGFFTDAYDLFSISLVTKLLGRYYH  
OsPT1 ----MAGGQLNVLSTLDQAKTQWYHFMAIVIAGMGFFTDAYDLFCISLVTKLLGRYYH  
OsPT3 ----MADGQLKVLTTLDHARTQWYHFMAIVIAGMGFFTDAYDLFCISLVSKLLGRYYT  
OsPT2 ----MAGSQLNVLKLDQAKTQWYHFMAIVIAGMGFFTDAYDLFCIALVTKLLGRLYYT  
OsPT6 MGGGGGEQQLEVLHALDVAKTQWYHFTAIVVAGMGFFTDAYDLFCISLVTKLLGRYYR  
OsPT7 ----MAGDQMHVLSALDSAKTQWYHFTAIVIAGMGFFTDAYDLFCISLVTKLLGRYYT  
OsPT12 ---MGRQDQQLQVLNALDAKTQWYHFTAIVIAGMGFFTDAYDLFCISLVTKLLGRYYT  
OsPT4 ----MAGELKVLNALSADAKTQWYHFTAIVIAGMGFFTDAYDLFSISLVTKLLGRYYF  
OsPT5 ----MVQDRKVLDAALDTAKTQWYHFTAIVIAGMGFFTDAYDLFCISLVTKLLGRYYF  
OsPT8 ---MARQEQQLHLQVLSALDAKTQWYHFTAIVVAGMGFFTDAYDLFCISLVTKLLGRYYT  
LePT2 MAVGNDNNNLQVLNALDLAKTQLYHFTAIVIAGMGFFTDAYDLFSISLVTKLLGRLYYT  
StPT2 ---MAVEDNNLQVLNALDLAKTQLYHFTAIIAGMGFFTDAYDLFCISLVTKLLGRYYT  
MtPT1 ----MSGELGVLNALDVAKTQLYHFTTIVIAGMGFFTDAYDLFCISLVTKLLGRYYT  
MtPT2 ----MSGELGVLNALDVAKTQLYHFTTIVIAGMGFFTDAYDLFCISLVTKLLGRYYT  
AT5g43350 ----MAEQQLGVLKALDVAKTQLYHFTAIVIAGMGFFTDAYDLFCVSLTKLLGRYYF  
AT5g43370 ----MAEQQLGVLKALDVAKTQLYHFTAIVIAGMGFFTDAYDLFCVSLTKLLGRYYF  
AT5g43360 ----MADQQLGVLKALDVAKTQLYHFTAIVIAGMGFFTDAYDLFCVSLTKLLGRLYYF  
At2g38940 ----MAREQLQVLNALDVAKTQWYHFTAIIAGMGFFTDAYDLFCISLVTKLLGRYYH  
AT3g54700 ----MAGDQLNVLNALDVAKTQWYHFTAIIAGMGFFTDAYDLFCISLVTKLLGRYYH  
LePT1 ----MANDLQVLNALDVAKTQLYHFTAIVIAGMGFFTDAYDLFCISMTVTKLLGRLYYH  
NtPT1 ----MAKDLQVLNALDVAKTQLYHFTAIVIAGMGFFTDAYDLFCISLVTKLLGRYYH  
StPT1 ----MANDLQVLNALDVAKTQLYHFTAIVIAGMGFFTDAYDLFCISMTVTKLLGRYYH  
StPT3 ----MAKNCLQVLNALDVAKTQLYHFTAIVIAGMGFFTDAYDLFCISLVTKLLGRYYH  
At1g20860 ----MP1KVLSSLDVARTQWYHFKAIIIVAGMGLFTDAYDLFCIAPVMKMSIQYYH  
At1g76430 ----MPELSLLSALDAARIQWYHFKAIIIVAGMGLFTDAYDLFCIAPVMKMSIQYYH  
OsPT9 ----MAPRIRVLAALDQARTQYHFKAIIIVAGMGLFTDSYDLFCISPMKIFGRVYYA  
OsPT10 ----MAP1GVLTAALDQARTQYHFKAIIIVAGMGLFTDSYDLFCIAPVMKIFGRVYYA

OsPT13 -----GELPRNIHAAVTGIALCGTVPQQLVFGWL GATKWAGSVSMESPSSMV  
OsPT11 PDGSTD---SKPGALSKTANMVI GVALVGTLMGQLVFGYFG-DKLGKRKYVGVTLILMA  
AT5g43340 VPGS-----SSPGSLPDGISA AVS V G V A F A G T F I G Q I F F G C L G -D K L G R K R Y V G T L L I M T  
At2g32830 VDSS-----KKPGTLPNVA AVN G V A F C G T L A G Q L F F G W L G -D K L G R K K V Y G I T L M L M V  
OsPT1 DDSK-----DTPGALPPNVSA AVT G V A L C G T L A G Q L F F G W L G -D K L G R K S V Y G T L I L M V  
OsPT3 DLAG-----DNP G S L P P N V S A A V N G V A L C G T L A G Q L F F G W L G -D K L G R K S V Y G F T L V L M V  
OsPT2 DITK-----PNPGTLPNVS SAVT G V A L C G T L A G Q L F F G W L G -D K L G R K S V Y G F T L I L M V  
OsPT6 VDGS-----PSPGTLPPHVSASVNGVAFVGTLSGQLFFGWLG-DKLGKRKYVGVTLILMV  
OsPT7 ADGA-----SKPGSLPPNVSA AVN G V A F V G T L T G Q L F F G W L G -D R V G R K S V Y G M T L L L M I  
OsPT12 DPAS-----PXP G S L P P N I A A A V N G V A L C G T L S G Q L F F G W L G -D K L G R K S V Y G M T L L L M V  
OsPT4 NPAS-----KSPGSLPPNVSA AVN G V A F C G T L A G Q L F F G W L G -D K M G R K K V Y G T L M L M V  
OsPT5 NPAS-----KSPGSLPPNVSA AVN G V A F C G T L A G Q L F F G W L G -D K M G R K K V Y G M T L M L M V  
OsPT8 DLAK-----ENPGSLPPNVA AVN G V A F C G T L A G Q L F F G W L G -D K L G R K S V Y G M T L L M M V  
LePT2 KPDL-----LKP G T L P P A V S A S V T G V A L V G T L A G Q L F F G W L G -D K M G R K K V Y G M T L V L M V  
StPT2 KPDL-----LKP G T L P P A R V G L R H G C A L V G T L A G Q L F F G C A R L A K M G R K K V Y G M T L V L M V  
MtPT1 EPNP-----TRPGTLPSSAQSAVTGVALVGTLAGQLFFGWLG-DKLGKRKYVGLTILMV  
MtPT2 EPNP-----TRPGTLPSSAQSAVTGVALVGTLAGQLFFGWLG-DKLGKRKYVGLTILMV  
AT5g43350 NPES-----AKPGSLPPHVA AVN G V A L C G T L S G Q L F F G W L G -D K L G R K K V Y G T L V M M I  
AT5g43370 NPES-----AKPGSLPPHVA AVN G V A L C G T L S G Q L F F G W L G -D K L G R K K V Y G T L I M M I  
AT5g43360 NPTS-----AKPGSLPPHVA AVN G V A L C G T L A G Q L F F G W L G -D K L G R K K V Y G I T L I M M I  
At2g38940 VEGA-----QKPGTLPNVA AVN G V A F C G T L A G Q L F F G W L G -D K L G R K K V Y G M T L M V M V  
At3g54700 VDGS-----EKPGTLPNVS AVN G V A F C G T L A G Q L F F G W L G -D K L G R K K V Y G M T L M V M V  
LePT1 HDGA-----LKP G S L P P N V S A A V N G V A F C G T L A G Q L F F G W L G -D K M G R K K V Y G M T L M I M V  
NtPT1 RDGA-----LKP G S L P P N V S A A V N G V A F C G T L A G Q L F F G W L G -D K M G R K K V Y G M T L M M M V  
StPT1 HDNA-----LKP G S L P P N V S A A V N G V A F C G T L A G Q L F F G W L G -D K M G R K K V Y G M T L M I M V  
StPT3 HEGA-----PKPGILPPGIS AVN G V A F V G T L S G Q L F F G W L G -D K M G R K R Y V G M T L M I M V  
At1g20860 GD-----SINTAVLSTSYAIAL LGTATGQLVFGYLG-DRVGRRRVYGLCLIIIMI  
At1g76430 KD-----SIGTALLSTSYAIAL LGTALGQLIFGYLG-DRVGRRRVYGLSLLIMV  
OsPT9 P S G S V D G S G S P G V T P P A V V S A T V G V A L L G A V A G N V V F G A L G -D R V G R R R V Y G A C L L L M V  
OsPT10 -----D-GGARPGVTPPAVVSATVGVALLGAVIGNVVFALG-DRVGRRRVYGACLLMLL

OsPT13 VSSLASGLSF-----IGGDYPLSATIMSEYANKRTRGAFIAAV  
OsPT11 ACAIGSGLSFGSSRKA-VIGTLCFFRFWLGFGIGGDYPLSATIMSEYSNKKTRGAFIAAV  
AT5g43340 IC S I C S G L S L G R D P K T - V M V T L C F F R F W L G F G I G G D Y P L S A T I M S E Y S N K K T R G A F I A A V  
At2g32830 LC SL G S G L S F G H S A N G - V M A T L C F F R F W L G F G I G G D Y P L S A T I M S E Y A N K K T R G A F I A A V  
OsPT1 VCSVASGLSFGSSAKG-VVSTLCFFRFWLGFGIGGDYPLSATIMSEYANKRTRGAFIAAV  
OsPT3 VCSVASGLSFGRTAKG-VVXLCFFRFWLGFGIGGDYPLSATIMSEYANKRTRGAFIAAV  
OsPT2 VCSIASGLSFGHTPKS-VIATLCFFRFWLGFGIGGDYPLSATIMSEYANKRTRGAFIAAV  
OsPT6 LC SL A S A L S F G H T P T S - V M A T L C F F R F W L G F G I G G D Y P L S A T I M S E Y A N K K T R G A F I A A V  
OsPT7 IC SV A S G L S F G D T P T S - V M A T L C F F R F W L G F G I G G D Y P L S A T I M S E Y A N K R T R G A F I A A V  
OsPT12 IC S I A S G L S F S H T P T S - V M A T L C F F R F W L G F G I G G D Y P L S A T I M S E Y A N K K T R G A F I A A V  
OsPT4 IC CL A S G L S F G S S A K G - V M A T L C F F R F W L G F G I G G D Y P L S A T I M S E Y A N K R T R G A F I A A V  
OsPT5 IC CL A S G L S F G S S A K G - V M A T L C F F R F W L G F G I G G D Y P L S A T I M S E Y A N K R T R G A F I A A V  
OsPT8 IC S I A S G L S F S H T P T S - V M A T L C F F R F W L G F G I G G D Y P L S A T I M S E Y A N K K T R G A F I A A V  
LePT2 VCSVASGLSFGSTPKG-VMTTLCFFRFWLGFGIGGDYPLSATIMSEYANKRTRGAFIAAV  
StPT2 VCSVASGLSLGNTPKV-VMTTLCFFRFWLGFGIGGDYPLSATIMSEYANKRTRGAFIAAV  
MtPT1 VCSVSGLSFGSSPKS-VMATL CFFRFWLGFGIGGDYPLSATIMSEYANKRTRGAFIAAV  
MtPT2 VCSVASGLSFGSSPKS-VMATL CFFRFWLGFGIGGDYPLSATIMSEYANKRTRGAFIAAV  
AT5g43350 LC SV A S G L S F G H E A K G - V M T T L C F F R F W L G F G I G G D Y P L S A T I M S E Y A N K K T R G A F I A A V  
AT5g43370 LC SV A S G L S F G N E A K G - V M T T L C F F R F W L G F G I G G D Y P L S A T I M S E Y A N K K T R G A F I A A V

AT5g43360 LCSVASGLSLGNSAKG-VMTTLCFFRFWLFGFVGIGDYPLSATIMSEYANKKTRGAFIAAV  
At2g38940 LCSIASGLSFGHEPKA-VMATLCFFRFWLFGFVGIGDYPLSATIMSEYANKKTRGAFVSAV  
AT3g54700 LCSIASGLSFGSNPKT-VMTTLCFFRFWLFGFVGIGDYPLSATIMSEYANKKTRGAFIAAV  
LePT1 ICASIAGLSFGHTPKG-VMTTLCFFRFWLFGFVGIGDYPLSATIMSEYANKKTRGAFIAAV  
NtPT1 ICASIAGLSFGHTPKG-VMTTLCFFRFWLFGFVGIGDYPLSATIMSEYANKKTRGAFIAAV  
StPT1 ICASIAGLSFGHTPKS-VMTTLCFFRFWLFGFVGIGDYPLSATIMSEYANKKTRGAFIAAV  
StPT3 ICASIAGLSFGKTPSG-VIATLCFFRFWLFGFVGIGDYPLSATIMSEYANKKTRGAFIAAV  
At1g20860 LSSFSGCGFSVCTTRRSCVMVSLGFFRFVLLGLGIGDYPLSATIMSEFANKRTRGAFIAAV  
At1g76430 FSSFSGCGFSVCTTRRSCVMVSLGFFRFVLLGLGIGDYPLSATIMSEFANKRTRGAFIAAV  
OsPT9 CSSVSGLSVCRXRR-ALASLCFFRFVLLGVGVGGDYPLSATIMSEFANRTRGAFIAAV  
OsPT10 R--RERLLRVPDAPVR-ARQPL-LLPFLLVGVGVGGDYPLSATIMSEFANRTRGAFIAAV

OsPT13 FAMQGFGLAAGIIGMIVSAAFH-----SS---ASKIDYAWRIILMFGAIP  
OsPT11 FAMQGVGIIIFAGLVSMIVSIFLTYNKAPSYPKGNHDLR---QMPAADYVWRIVLMIGAFP  
AT5g43340 FGMQGITILAAAGAVSLVSAVFSKFPSPRAYILDGAASST---VPQADYVWRILMFGALP  
At2g32830 FAMQGFGLAGGIVLSLVSTFDHAFKAPTYEVDVPGST---VPQADYVWRIVLMFGAIP  
OsPT1 FAMQGFGLFAGIIVALVSAAGRFRHAYPAPSYSDNHAASL---VPQADYVWRILMFGTVP  
OsPT3 FAMQGFGLFAGIIVALVSAAGRFRHAYPAPSYADGRAASL---VPEADYVWRILMFGTVP  
OsPT2 FAMQGFGLFAGIIVALVSAAGRFRHAYPAPSYAQNPAASL---APQADYVWRILMFGTIP  
OsPT6 FAMQGFGLIITGGLVAILVSAFRAAFPAPPYGEDPVAASL---PPQADYVWRILMFGALP  
OsPT7 FAMQGFGLAGGAVAIGITAIIFRSRFPAPPFAADPAASL---PPQADYVWRILMFGALP  
OsPT12 FAMQGFGLAGGVVTLAMSAGFQAAPAPAYEVNAAASL---VPQADYVWRILMFGALP  
OsPT4 FAMQGFGLTGGIVAVIISAAFKSRFDAPAYRDDRTGST---VPQADYVWRIVLMFGAIP  
OsPT5 FAMQGFGLTGGIVAVIISAAFKSLRFDAPAYRDDRAXX-----ADYAWRIVLMFGAIP  
OsPT8 FAMQGFGLAGGIVTLIISAFRAGFPAPAYQDDRAGST---VRQADYVWRILMFGAMP  
LePT2 FAMQGFGLFSGIVALITAAGFDHAYRSPTFEENAALST---VPQSDYIWRILMFGSLP  
StPT2 FAMQGFGLFSGIVALITAAGFDHAYKAPTFAENAAVST---VPQADYIWRILMFGSLP  
MtPT1 FAMQGFGLGGGIVALIVASIFDHKYKVPTEENPATSL---LVQFDYVWRILMFGALP  
MtPT2 FAMQGFGLGGGIVALTVASIFDHKYKVPTEENPAASL---LVQFDYVWRILMFGALP  
AT5g43350 FAMQGVGILAGGFVALAVSSIFDKKFPAPTYAVNRALST---PPQVDYIWRILMFGALP  
AT5g43370 FAMQGVGILAGGFVALAVSSIFDKKFPAPTYAVNRALST---PPQVDYIWRILMFGALP  
AT5g43360 FAMQGVGILAGGFVALAVSSIFDKKFPAPTYEQDRFLST---PPQADYIWRILMFGALP  
At2g38940 FAMQGFGLMAGGIFAIISAFKFPAPYADDALGST---IPQADLVWRILMFGAIP  
AT3g54700 FAMQGFGLTGGIFAIISAFKFPAPTYQIDALAST---VPQADYVWRILMFGALP  
LePT1 FAMQGFGLAGGMVAIIVSAAFKGAFPAPAYEVDAIGST---VPQADYVWRILMFGAIP  
NtPT1 FAMQGFGLAGGMVAIIVSAAFKGAFPAPTYHADALAST---VSQADYVWRILMFGAIP  
StPT1 FAMQGFGLAGGMVAIIVSAAFKGAFPAPAYEVDALAST---VSQADYVWRILMFGAIP  
StPT3 FAMQGFGLAGGIVALVSGAFKNAYPAPIYSVNEGST---PQEADYVWRILMFGAIP  
At1g20860 FSMQGLGILVSSAVTMVAVCFKRSGGG---LEVDAAS-----PTEADLAWRILMFGALP  
At1g76430 FSMQGLGILMSSAVTMVAVCLAFKNAGEGSSSEKTNVAGLETAPPESDIAWRILMFGALP  
OsPT9 FSMQGFGLVSSAVTMVAVAAFDHYTYGAPPLD-----TPECADLAWRILMAGAVP  
OsPT10 FSMQGFGLASSAVTMVAVAAFDHYTYGAPPLD-----TPECADLAWRILMAGAVP

OsPT13 AALTYWRMKMPETARYTALISKNAKKAADMSAVLNVNI---TPDDEVINE-LA-----  
OsPT11 ALATFYWRMKMPETARYTALIDGNAKQAANDMQKLSIEI---EAEQEKLAK-F-----  
AT5g43340 ALLTYWRMKMPETARYTALVSKNAEQALDMTKVLNVDI---EASAANKDQ-----  
At2g32830 ALLTYWRMKMPETARYTALVARNTKQAASDMSKVLQVDL---IAEEEAQNSN-----  
OsPT1 AALTYWRMKMPETARYTALARNAKQAAADMSKVLHTQI---EESADRAET-VA-----  
OsPT3 AALTYWRMKMPETARYTALARNAKQAAADMSKVLXTEI---QEDXERAE-AVA-----  
OsPT2 AGLTYWRMKMPETARYTALVARNAKQAAADMSKVLHAEI---EERPEVVS-----  
OsPT6 AALTYWRMKMPETARYTALVANNAKQAAADMSKVLQV---VEMRNIGN-----  
OsPT7 AALTYWRMKMPETARYTALVAKNAERAAADMSKVLQVKI---TAEQAEMASVDP-----  
OsPT12 AILTYWRMKMPETARYTALVAKDAKQASSDMAKVLQVEI---EVEEEKLQD-IT-----  
OsPT4 ALLTYWRMKMPETARYTALVAKNAKQAAADMTQVLNVEI---VEEQEKADE-VA-----  
OsPT5 ALLTYWRMKMPETARYTALVAKNDKQAAADMARVNLVEL---VDEQEKAATAAA-AE-----  
OsPT8 ALLTYWRMKMPETARYTALVAKNAKQAAADMSKVLQVEI---QEEQDKLEQ-MVTR---  
LePT2 AALTYWRMKMPETARYTALVAKDAKRAAQ-MGKVLQVEI---ESEEAKIEQ-ISRN---  
StPT2 AALTYWRMKMPETARYTALVAKDAKRAAQDMGRVLQVEI---ESEEAKIEQ-ISRN---  
MtPT1 AALTYWRMKMPETARYTALVAKNAKQAAADMSKVLQVEL---EVEEEKVQK-MT-----  
MtPT2 AALTYWRMKMPETARYTALVAKNAKQAAADMSKVLQVEL---EVEEEKVEK-MT-----  
AT5g43350 AALTYWRMKMPETARYTALVAKNIKQATADMSKVLQTDI---ELEER-VED-DV-----  
AT5g43370 AALTYWRMKMPETARYTALVAKNIKQATADMSKVLQTDI---ELEER-VED-DV-----  
AT5g43360 AALTYWRMKMPETARYTALVAKNIKQATADMSKVLQTDL---ELEER-VED-DV-----  
At2g38940 AAMTYYSRSKMPETARYTALVAKDAKQAAADMSKVLQVEI---EPEQKLEE-IS-----  
At3g54700 AAMTYYSRSKMPETARYTALVAKDAKLAASNSKVLQVEI---EAEQQGTE-----  
LePT1 AGLTYWRMKMPETARYTALVAKNLKQAANDMSKVLQVEI---EAEPEKVTA-IS-----  
NtPT1 AAMTYWRMKMPETARYTALVAKNLKQAANDMSKVLQVEI---EAEPEKVTA-IS-----  
StPT1 AGLTYWRMKMPETARYTALVAKNLKQAANDMSKVLQVEI---EAEPEKVA-IS-----  
StPT3 ALLTYWRMKMPETARYTALVAKNAKQAASDMSKVLNVEI---EAEDDKIEK-IV-----  
At1g20860 AALTYWRMLMPETARYTALVENNVQAQKDMQVRMSRSH---ISDEATTD-PP-----  
At1g76430 AALTYWRMLMPETARYTALVENNVQAQKDMQVRMSVSMISQITEDSSSEL-----  
OsPT9 AALTYWRMSMPETARYTALVERDVVKATNDIGRVLADLDAVAEEVEVAALSPPPVT  
OsPT10 AALTYWRMSMPETARYTALVERDVVKATNDIGRVLADLDAVAEEVEVAALSRP----

OsPT13 ----RQDEYGLFSFEFLHRHGLHLLGTTVCWFLVDVTFYSLNIFMKNIIFTEVGLLPRLDS  
OsPT11 ---NAANNYPLL SMEFARRHGLHLLGTTTTWFLLDIAFYSQLTKQDIFPAMGLISG--A  
AT5g43340 -ARVSSDEFGLFSMKFLRRHGLHLLGTASTWFLLDIAFYSQLFQKDIFTTIGWPS--A  
At2g32830 -SSNPNFTFGLFTREFARRHGLHLLGTTTTWFLLDIAFYSQLFQKDIYTAIGWIPA--A  
OsPT1 ---VGGESWGLFSRQFLRRHGLHLLATTSTWFLLDIAFYSQLFQKDIFSKVGWIPP--A  
OsPT3 --GGAG GLFSRQFVRRHGVLHLLVATTSTWFLLDIAFYSQLFQKDIFSKVGWIPP--A  
OsPT2 -QVVAGETWGLFSRQFMRRHGHLHLLATTSTWFLLDIAFYSQLFQKDIFSKVGWIPP--A

OsPT6 -NGGSRPFGLFSGEFVRRHGLHLVGTSAWLLLDIAFYSQLFQKDI FSAVGVIPK--A  
OsPT7 -KPFTSKPFGLFSGEFARRHGFLHLLGTTSTWLLLDIAFYSQLFQKDI FSAIGWIPE--A  
OsPT12 ----RGRDYGLFSARFAKRHGAHLLGTAATWFLVDVAYSQLFQKDI FTSIHWIPK--A  
OsPT4 ----RREQFGLFSRQFLRRHGRHLLGTTVCWFVLDIAFYSSNL FQKDIYTAVQWL PK--A  
OsPT5 EEAARREQYGLFSREFARRHGHLHLLGTTVCWFVLDIAFYSQLFQKDIYTAVQWL PK--A  
OsPT8 ----NSSSFGLFSRQFARRHGLHLLVGTATTWFLLDIAFYSQLFQKDI FTSINWIPE--A  
LePT2 ----ETNQFGLFSWEFVRRHGLHLFGTCSTWFLLDIAFYSQLFQKDVFSAVGVIPK--A  
StPT2 ----ETNQFGLFSWEFVRRHGLHLFGTCSTWFLLDIAFYSQLFQKDVFS--VGVIPK--A  
MtPT1 --SDKRNSYGLFSKQFAARHGLALFGTCSTWFLLDIAFYSQLFQKDI FSAIGWIPE--A  
MtPT2 --SDKRNSYGLFSKQFAARHGLALFGTCSTWFLLDIAFYSQLFQKDI FSAIGWIPE--A  
AT5g43350 --KDPKQNYGLFSKEFLRRHGLHLLGTTSTWFLLDIAFYSQLFQKDI FSAIGWIPE--A  
AT5g43370 --KDPKQNYGLFSKEFLRRHGLHLLGTTSTWFLLDIAFYSQLFQKDI FSAIGWIPE--A  
AT5g43360 --KDPKQNYGLFSKEFLRRHGLHLLGTTSTWFLLDIAFYSQLFQKDI FSAIGWIPE--A  
At2g38940 --KEKSKAFGLFSKEFMSRHLHLLGTTSTWFLLDIAFYSQLFQKDI FSAIGWIPE--A  
AT3g54700 --DKSNSFGLFSKEFMRHGLHLLGTTSTWFLLDIAFYSQLFQKDI FSAIGWIPE--A  
LePT1 -EAKGANDFGLFTKEFLRRHGLHLLGTASTWFLLDIAFYSQLFQKDI FSAIG--IPE--A  
NtPT1 --QNTGNEFGLFSKEFLRRHGLHLLGTASTWFLLDIAFYSQLFQKDI FSAIGWIPE--A  
StPT1 -VANGANFGLFSKEFLRRHGLHLLGTASTWFLLDIAFYSQLFQKDI FSAIGWIPE--A  
StPT3 --AIQGNFGLFSKEFLRRHGLHLLGTTSTWFLLDIAFYSQLFQKDI FSKIGWIPE--P  
At1g20860 -PPPPPSYKLFSRFFRLHGRDLFAASFNWFLVDIVFYTNLLLSHIFSHYSKPK--S  
At1g76430 EQPPSSSYKLFSRFFRLHGRDLFAASFNWFLVDIVFYTNLLLSHIFSN--KP--L  
OsPT9 TPPPPrPSYGLFSRRFVRQHGRDLFACAAWFLLDIPYSSSTLFQSQIYRP--WFP--A  
OsPT10 -PPPPPrSYGLLSRRFVRQHGRDLFACAAWFLLDIPYSSSTLFQSQIYRPL--FPA--P

OsPT13 EYHHTLQRMITMTAVHTFISLGCALPGYFFTVAFVDRIGRVKIQLIGFTMMTVFMLCLAI  
OsPT11 AEVNLTMEFQISKASFLVALLGTFPGYWTVVALIDKMGRYMIQLIGFTMMSMFMLAMGI  
AT5g43340 KTMNAIQELYMIKAQTIACSTVPYGFYFTVGFIDYMGKRIQIMGFAMMTIFMLSLAI  
At2g32830 ETMNAIHEVFTVSKAQTIALCGTVPGYWTFVAFIDILGRFFIQLMGFFMTIFMFLAI  
OsPT1 KTMNALEELYRIARAQALIALCGTIPGYWTFVAFIEIMGRFVIQIMGFAMMTAFMLGLAI  
OsPT3 RTMNAVEEVFRIARAQALIALCGTIPGYWTFVAFIDVAGRFAIQIMGFAMMTAFMLGLAA  
OsPT2 KTMNALEELYRISRAQALIALCGTIPGYWTFVAFIDVGRFVIQIMGFMMTVFMLALGV  
OsPT6 ATMSALEELFRIARAQALIALCGTIPGYWTFVALIDVGRFKIQAVGFFMMTLMFLTLAL  
OsPT7 KTMNALEELYRIARAQALIALCGTIPGYWTFVALIDVGRFKIQAAAGFVMTAFMLALAV  
OsPT12 RTMSELEEVFRIARAQALIALCGTIPGYWTFVFLIDVGRFKIQLLGFAGMTAFMLGLAI  
OsPT4 DTMSALEEMFKISRAQTLVALCGTIPGYWTFVFFIDIIGRFVIQLLGGFFMTAFMLGLAV  
OsPT5 DTMSALEEMFKISRAQTLVALCGTIPGYWTFVFLIDVGRFAIQLLGGFFMTAFMLGLAV  
OsPT8 KTMNALEEVFRIARAQALIALCGTIPGYWTFVFLIDVGRFAIQLLGGFFMTAFMLGLAV  
LePT2 PTMNAVQELYKIAQAQALIALCSTVPYGFYFTVAFIDVGRFAIQIMGFMMTVFMFAIAI  
StPT2 PTMNAVQELYKIAQAQALIALCSTVPYGFYFTVAFIDVGRFAIQIMGFMMTVFMFAIAI  
MtPT1 KEMNAIHEVYKIAQAQALIALCSTVPYGFYFTVAFIDHMGFRFAIQMMGFMMTVFMFLAI  
MtPT2 KEMNAIHEVYKIAQAQALIALCSTVPYGFYFTVAFIDHMGFRFAIQMMGFMMTVFMFLAI  
AT5g43350 ATMNAIHEVRIARAQALIALCSTVPYGFYFTVAFIDVGRFKIQLLNGFFMMTVFMFAIAF  
AT5g43370 ATMNAIHEVRIARAQALIALCSTVPYGFYFTVAFIDVGRFKIQLLNGFFMMTVFMFAIAF  
AT5g43360 ATMNAIHEVFKIAQAQALIALCSTVPYGFYFTVAFIDVGRFAIQIMGFMMTVFMFAIAF  
At2g38940 QSMNAIQEVFKIAQAQALIALCSTVPYGFYFTVAFIDVGRFAIQIMGFMMTVFMFLAI  
AT3g54700 QTMNAIQEVFKIAQAQALIALCSTVPYGFYFTVAFIDVGRFAIQIMGFMMTVFMFLAI  
LePT1 QTMNALEEVYKIAQAQALIALCSTVPYGFYFTVAFIDKIGRFVIQIMGFMMTVFMFLAI  
NtPT1 ETMNALEEVYKIAQAQALIALCSTVPYGFYFTVAFIDRIGRFVIQIMGFMMTVFMFLAI  
StPT1 QTMNALEEVYKIAQAQALIALCSTVPYGFYFTVAFIDRIGRFVIQIMGFMMTVFMFLAI  
StPT3 ETMNALEEVFKIAQAQALIALCSTVPYGFYFTVAFIDRWGRFAIQIMGFMMTVFMFLAI  
At1g20860 TAENVYDAAEVFAELGAIIAACSTIPGYWTFVYFIDKIGRVKIQIMGFMMTVYLVAGI  
At1g76430 NSTNVYDSAFEVAKLAAIVAACSTIPGYWTFVYFIDKIGRVKIQIMGFMMTVYLVAGI  
OsPT9 AKVNAFQEAQFVAKFQAVIAVASTIPGYFAAMLLIERAGRRRLQMGFLLMAVFLFALAG  
OsPT10 GLINAFQEAQFVAKFQAVIAVASTIPGYFAAMLLIDRVGRRLQMGFLLMAVFLFALAG

OsPT13 PYD-QWLRHK-NKYGFVVMYGLTFFFANFGPNSTTFFIIPAEIFPARLRSTCHGISAVGK  
OsPT11 LYD-YL--KT-HHFLFGLLYALTFFFANFGPNSTTFFVLPALFPTRVRSSTCHISAAGK  
AT5g43340 PYH-HWTLPA-NRIGFVVLYSFTFFFANFGPNATTFIVPAEIFFPARLRSTCHGISAASGK  
At2g32830 PYD-HWRHRE-NRIGFVIMYSLTFFFANFGPNATTFVVPAEIFFPARLRSTCHGISAASGK  
OsPT1 PYH-HWTTPG-HHTGFVVMYGLTFFFANFGPNSTTFFIIPAEIFFPARLRSTCHGISAAGK  
OsPT3 PYH-HWTTPG-NHTGFVVMYGLTFFFANFGPNATTFIVPAEIFFPARLRSTCHGISAAGK  
OsPT2 PYD-HWTHPA-HHTGFVVLALYALTFFFANFGPNSTTFFIIPAEIFFPARLRSTCHGISAASGK  
OsPT6 PYH-HWTAPGKNHVGLLLYGLTFFFANFGPNSTTFFIIPAEIFFPARLRSTCHGISAASGK  
OsPT7 PYD-HWTAAG-NQIGFVVLALYALTFFFANFGPNATTFIVPAEIFFPARLRSTCHGISAASGK  
OsPT12 PYH-HWTMPG-NQVIFVFLYGLTFFFANFGPNATTFIVPAEIFFPARLRSTCHGISAASGK  
OsPT4 PYH-HWTTPG-NHIGFVVMYGLTFFFANFGPNSTTFFIIPAEIFFPARLRSTCHGISAAGK  
OsPT5 PYH-HWTTPG-NHVGFMVYAFVFFFANFGPNSTTFFIIPAEIFFPARLRSTCHGISAAGK  
OsPT8 PYH-HWTTKG-NHIGFVVMYAFVFFFANFGPNSTTFFIIPAEIFFPARLRSTCHGISAAGK  
LePT2 PYH-HWTLA-NRIGFVIMYSLTFFFANFGPNATTFVVPAEIFFPARLRSTCHGISAAGK  
StPT2 PYH-HWTLA-NRIGFVIMYSLTFFFANFGPNATTFVVPAEIFFPARLRSTCHGISAAGK  
MtPT1 PYD-HWSKEE-NRIGFVVMYSLTFFFANFGPNATTFVVPAEIFFPARLRSTCHGISAAGK  
MtPT2 PYD-HWSKEE-NRIGFVVIYSLTFFFANFGPNATTFVVPAEIFFPARLRSTCHGISAAGK  
AT5g43350 PYN-HWIKPE-NRIGFVVMYSLTFFFANFGPNATTFIVPAEIFFPARLRSTCHGISAAGK  
AT5g43370 PYN-HWIKPE-NRIGFVVMYSLTFFFANFGPNATTFIVPAEIFFPARLRSTCHGISAAGK  
AT5g43360 PYN-HWILPD-NRIGFVVMYSLTFFFANFGPNATTFIVPAEIFFPARLRSTCHGISAAGK  
At2g38940 PYN-HWTHKE-NRIGFVIMYSLTFFFANFGPNATTFVVPAEIFFPARLRSTCHGISAASGK  
AT3g54700 PYD-HWTHKE-NRIGFVAMYSLTFFFANFGPNATTFVVPAEIFFPARLRSTCHGISAASGK  
LePT1 PYH-HWTLKD-HRIGFVVMYSLTFFFANFGPNATTFVVPAEIFFPARLRSTCHGISAAGK  
NtPT1 PYH-HWTLKD-NRIGFVIMYSLTFFFANFGPNATTFVVPAEIFFPARLRSTCHGISAAGK  
StPT1 PYH-HWTLKD-NRIGFVVMYSLTFFFANFGPNATTFVVPAEIFFPARLRSTCHGISAAGK  
StPT3 PYN-HWTKKE-NRIGFVVMYSLTFFFANFGPNATTFVVPAEIFFPARLRSTCHGISAAGK

|           |                                                                  |
|-----------|------------------------------------------------------------------|
| At1g20860 | PYSWYWSKHEHNKGMVLYGLVFFFCNFGPNTTTFIIPAELFPARFRSTCHGISGAAGK       |
| At1g76430 | PYSWYWSKHEKTKNGFMVLYGLIFFFSNFGPNTTTFIIPAELFPARFRSTCHGISGAAGK     |
| OsPT9     | PYDGYWRDH-AKTAGYIVLYSLTFFSANLGPNTTTFILPAELFPARFRSTCHGLSGAAGK     |
| OsPT10    | PYDGYWRDH-GAHAGYIVLYSLTFFSANLGPNTTTFILPAELFPARFRSTCHGLSGAAGK     |
| OsPT13    | IGAIIVGVFGFLYTEYH-----IRIFLVLIGCNLVGFIITL-LLPESKG                |
| OsPT11    | AGAIVAAFGIQKLTYNQVVK-----SIKKALIIISITNMLGFFFTF-LVPETMG           |
| AT5g43340 | AGAMVGSFSGFSALVK-----ALGMSNTLYIMAGINLLGLLTF-TIPETNG              |
| At2g32830 | AGAIIVGAFGLYAAQSSDSEKTDA-GYPPGIGVRNSLLMLACVNLGIVFTL-LVPESKG      |
| OsPT1     | AGAIIGAFGLYAAQ--DQHKPEP-GYPRGIGIKNALFVLAGTNFLGIMTL-LVPESKG       |
| OsPT3     | AGAIIVGAFGLYAAQ--DPHKPEA-GYKPGIGIRNALFVLAGTXFLGMLMTL-LVPESKG     |
| OsPT2     | AGAIIGAFGLYAAQ--DQHNPDA-GYSRGIGIRNALFVLAGTNFLGMLMTL-LVPESKG      |
| OsPT6     | LGAIIVGSFGLYLAQSPDRSKTEH-GYPPGIGVRNSLFLAACNLLGLLTF-LVPESKG       |
| OsPT7     | VGAIIVGSFGLYLAQSPVPAKAAAHGYPPGIGVRNSL FALAGCSLLGLLTF-LVPEPKG     |
| OsPT12    | AGAIIGAFGLYAAQPDKAHVDA-GYKPGIGVRNALFVLAGCNLVGFLMTWMLVPEPKG       |
| OsPT4     | AGAIIVGSFGLYAAQSTDASKTDA-GYPPGIGVRNSL FFLAGCNVIGFFFTF-LVPESKG    |
| OsPT5     | MGAIIVGSFGLYAAQSTDPSKTDA-GYPRGIGVRNSL FFLAGCNVVGFLFTF-LVPESKG    |
| OsPT8     | AGAIIGSFGLYAAQ--DPHKPDA-GYKPGIGVRNSL FVLAGCNLLGFICTF-LVPESKG     |
| LePT2     | AGAIIVGAYGFLYAAQSKDPNKTDA-GYPAGIGIKNSLIVLGCINLALGMLCTF-CVPEPKG   |
| StPT2     | AGAIIVGAYGFLYAAQSKDPMKTDA-GYPAGIGIKNSLIVLGFINALGMVCTF-CVPEPKG    |
| MtPT1     | AGAIIVGAFGLYAAQSKDPTKTDK-GYPTGIGIKNSLIMLVGINFVGMMLCTL-LVPESKG    |
| MtPT2     | AGAIIVGAFGLYAAQSKDPTKTDK-GYPTGIGIKNSLIMLVGINFVGMMLCTL-LVPESKG    |
| AT5g43350 | AGAIIVGAFGLYAAQSQDKAKVDA-GYPPGIGVKNLSIMLVGNFVGMMLFTF-LVPEPKG     |
| AT5g43370 | AGAIIGAFGLYAAQNDKAKVDA-GYPPGIGVKNLSIMLVGNFVGMMLFTF-LVPEPKG       |
| AT5g43360 | AGAIIVGAFGLYAAQPDKTKTDA-GYPPGIGVKNLSIMLVGINFVGMMLFTF-LVPEPKG     |
| At2g38940 | LGAMVGAFFGLYLAQNPDKDKTDA-GYPPGIGVRNSLIVLGVNVLGMLFTF-LVPESKG      |
| AT3g54700 | LGAMVGAFFGLYLAQSPDKTKTEH-GYPPGIGVKNLSIMLVGVNLLGMVFTL-LVPESKG     |
| LePT1     | AGAMVGAFFGLYAAQPTDPTKTDK-GYPPGHWCCELVDPRWLCNFGMLFTF-LVPEPNSG     |
| NtPT1     | AGAMVGAFFGLYAAQPTDPKKVDK-GYPAGIGVRNSLIVLGCNVLGMLVFTF-LVPESKG     |
| StPT1     | AGAMVGAFFGLYAAQPTDPKKTDK-GYPAGIGVRNSLIVLGCNVLGMLFTF-LVPESKG      |
| StPT3     | AGAIIVGAFGLYAAQSTDPSKVDA-GYPTGIGVKNLIVLGCNVLGMLFTL-LVPESKG       |
| At1g20860 | LGAIIVGTVGFVLWATKKMESDDKNQ-IYPEVNRMRIAFILILGGVCIAGILVTVYFFTKETMG |
| At1g76430 | FGAIIVGTVGFVLWATRHE----ED-GFPDVKRVRIAFLILGGVCIAGIMIVTYLFTRETMTG  |
| OsPT9     | LGALVGSIGFLWASQKQDGA--A-GHLPGIGMMYALFVLGGICLLGLALTYAFTPETMT      |
| OsPT10    | LGALVGSIGFLWASQKQDGA--A-GHLPGIGMMYALFVLGGICLLGLALTYVFTPETMM      |
| OsPT13    | KSLEDLTGEIEEFQE-EDEGESEVALSRPIHTVPL-----                         |
| OsPT11    | RSLEEISGEDGNTGAGGGGAPAAANAGVGVASDVS RDEKFPASSTEWQTSMHA-----      |
| AT5g43340 | KSLEELSGETEPEKIKEKIVV-----                                       |
| At2g32830 | KSLEEISREDEEQSG-GDTVVEMTVANSGRKVPV-----                          |
| OsPT1     | MSLEVISQEVADGDDEEAAPK-----                                       |
| OsPT3     | MSLEEVSKENVADDE-EATA-----                                        |
| OsPT2     | LSLEEMSKDNVDETAQEAIAQA-----                                      |
| OsPT6     | KSLEEMSGDAEAQEE-APPPLQTVL-----                                   |
| OsPT7     | KSLEEMSRENEVGQP-----                                             |
| OsPT12    | KSLEEMSGEADDEEA-SANGGATAVNNSGVEMV-----                           |
| OsPT4     | KSLEELSGENEDDDD-VPEAPATADHRTAPAPPA-----                          |
| OsPT5     | KSLEELSGENEMEAE-PAAATNSYRQTVPD SGQSE-----                        |
| OsPT8     | KSLEEMSGEAEDDDD-EVAAAGGGAAVRPQTA-----                            |
| LePT2     | KSLEEASQETITGEA-----                                             |
| StPT2     | KSLEEASQETITGE-A-----                                            |
| MtPT1     | KSLEELSGENEGEGA-EATEQEGPRFENVA-----                              |
| MtPT2     | KSLEELSGENEGEGA-EATEQEGSRV-----                                  |
| AT5g43350 | KSLEELSGEAEVSHD-EK-----                                          |
| AT5g43370 | KSLEELSGEAEVSHD-EK-----                                          |
| AT5g43360 | KSLEELSGEAEVDK-----                                              |
| At2g38940 | KSLEEMSGENEDNEN-SNNSDRTVPIV-----                                 |
| AT3g54700 | KSLEEMSGENEQNDE-SSSSNNNSNNAVSTA-----                             |
| LePT1     | KSLEDLSRENEGEEE-TVAEIRATSGRTVPV-----                             |
| NtPT1     | KSLEEMSRENEGEEE-SGTEMKNSGRTVPV-----                              |
| StPT1     | KSLEEMSRENEGEEE-TVAEMRATSGRTVLFK-----                            |
| StPT3     | KSLEEMSKENEGEEE-MTKVENATIPV-----                                 |
| At1g20860 | RSLEENEHDQDNNAESEDEPQIVDQSSVSTLLQTR-----                         |
| At1g76430 | RSLEENEDEIVSTSAGSSPANELLRRQY-----                                |
| OsPT9     | RSLEENESSVQAQSVGDGSDAGNGSDGLRFHELNLMEAAATKSPVSMASSHLSMSPIL       |
| OsPT10    | RSLEENESDRAQTQVGDGSDTEAAKSPASMASSHLSMSPILPARVSV-----             |
| OsPT13    | -----                                                            |
| OsPT11    | -----                                                            |
| AT5g43340 | -----                                                            |
| At2g32830 | -----                                                            |
| OsPT1     | -----                                                            |
| OsPT3     | -----                                                            |
| OsPT2     | -----                                                            |
| OsPT6     | -----                                                            |
| OsPT7     | -----                                                            |
| OsPT12    | -----                                                            |
| OsPT4     | -----                                                            |
| OsPT5     | -----                                                            |
| OsPT8     | -----                                                            |
| LePT2     | -----                                                            |

```
StPT2      -----  
MtPT1      -----  
MtPT2      -----  
AT5g43350  -----  
AT5g43370  -----  
AT5g43360  -----  
At2g38940  -----  
AT3g54700  -----  
LePT1      -----  
NtPT1      -----  
StPT1      -----  
StPT3      -----  
At1g20860  -----  
At1g76430  -----  
OsPT9      PHRMSL  
OsPT10     -----  
  
;  
end;
```
