# Supplementary material
Source: PubMed Central journal article supplement (PMC130632)
Supplement: pnas_202474599_7.pdf [file pnas_202474599_7.pdf]

| OsPT1 | OsPT2 | OsPT3 | OsPT4 | OsPT5 | OsPT6 | OsPT7 | OsPT8 | OsPT9 | OsPT10 | OsPT11 | OsPT12 | OsPT13 | AtPT1 |        |
|-------|-------|-------|-------|-------|-------|-------|-------|-------|--------|--------|--------|--------|-------|--------|
| 100   | 83.7  | 85.9  | 72.9  | 69.6  | 68.9  | 69.2  | 75.5  | 48.0  | 45.2   | 56.7   | 70.2   | 48.3   | 71.8  | OsPT1  |
|       | 100   | 81.4  | 70.6  | 67.8  | 69.7  | 70.9  | 74.2  | 47.5  | 44.7   | 57.0   | 71.2   | 46.8   | 70.4  | OsPT2  |
|       |       | 100   | 73.6  | 71.5  | 70.3  | 70.2  | 76.8  | 49.2  | 46.0   | 53.4   | 72.1   | 48.5   | 72.3  | OsPT3  |
|       |       |       | 100   | 87.4  | 71.9  | 71.5  | 77.5  | 45.7  | 43.3   | 55.2   | 72.3   | 55.6   | 73.5  | OsPT4  |
|       |       |       |       | 100   | 69.9  | 70.2  | 73.6  | 45.5  | 43.3   | 51.6   | 69.7   | 50.1   | 70.2  | OsPT5  |
|       |       |       |       |       | 100   | 75.9  | 74.0  | 45.7  | 43.3   | 54.5   | 72.1   | 46.6   | 72.5  | OsPT6  |
|       |       |       |       |       |       | 100   | 74.7  | 47.3  | 45.2   | 52.5   | 70.7   | 46.2   | 71.9  | OsPT7  |
|       |       |       |       |       |       |       | 100   | 46.4  | 44.5   | 53.0   | 78.7   | 51.5   | 74.0  | OsPT8  |
|       |       |       |       |       |       |       |       | 100   | 85.1   | 40.2   | 46.0   | 38.2   | 46.9  | OsPT9  |
|       |       |       |       |       |       |       |       |       | 100    | 38.1   | 43.3   | 38.4   | 44.5  | OsPT10 |
|       |       |       |       |       |       |       |       |       |        | 100    | 53.0   | 45.0   | 56.7  | OsPT11 |
|       |       |       |       |       |       |       |       |       |        |        | 100    | 51.1   | 72.9  | OsPT12 |
|       |       |       |       |       |       |       |       |       |        |        |        | 100    | 48.3  | OsPT13 |
|       |       |       |       |       |       |       |       |       |        |        |        |        | 100   | AtPT1  |
