# Supplementary material
Source: PubMed Central journal article supplement (PMC130632)
Supplement: pnas_202474599_8.pdf [file pnas_202474599_8.pdf]

1 MA-----GGQINLVLTLDQAKTQWYHFMAI VIAGMGFFTDAYDLFCISLVTKLLGRIYYTDDSKD-----TPGALPPNVSAAVTGVALCG OsPT1  
1 MA-----GSQINLVVKLDQAKTQWYHFMAI VIAGMGFFTDAYDLFCIALVTKLLGRLYYTDITKE-----NPGTLPPNVSSAVTGVALCG OsPT2  
1 MA-----DGQLKVLTTLDHARTQWYHFMAI VIAGMGFFTDAYDLFCISLVS KLLGRIYYTDLAGD-----NPGSLPPNVSAAVNGVALCG OsPT3  
1 MA-----GELKVLNALS AKTQWYHFMAI VIAGMGFFTDAYDLFSLSVLVTKLLGRIYYFNPA SK-----SPGSLPPNVSAAVNGVAFVCG OsPT4  
1 MV-----QDRKVLDA LDTAKTQWYHFMAI VIAGMGFFTDAYDLFSLSVLVTKLLGRIYYFNPA SK-----SPGSLPPNVSAAVNGVAFVCG OsPT5  
1 MGGGGGEEQQLEVLHALDVAKTQWYHFMAI VIAGMGFFTDAYDLFCISLVTKLLGRIYYRVDGSP-----SPGTLPPHVSASVNGVAFVCG OsPT6  
1 MAG-----DOMHVLSALDS AKTQWYHFMAI VIAGMGFFTDAYDLFCISLVTKLI GRVYYTADGAS-----KPGSLPPNVSAAVNGVAFVCG OsPT7  
1 MARQE-QQOHLQVLSALDA AKTQWYHFMAI VIAGMGFFTDAYDLFCISLVTKLLGRIYYTDLAKE-----NPGSLPPNVAAAVNGVAFVCG OsPT8  
1 MAP-----RIRVLAALDQARTQY YHFKA I VIAGMGLFTDSYDLFCISPVMKIFGRVYYAPSGSV DGS GSGPGVT PPAVVSATVGVALLG OsPT9  
1 MAP-----IGVLTALDQARTQY YHFKA I VIAGMGLFTDSYDLFCIAPVMKIVGRVYY S-----DGGARPGVT PPAVVSATVGVALLG OsPT10  
1 MADADG-GSNLAVLDALDSARTQMYHMKAI VIAGMGFFTDAYDLFCISTVSKLLGRLYYQPDGSTD---SKPGALSKTANMVI GVALVG OsPT11  
1 MGRQD-QQ--LQVINALDA AKTQWYHFMAI VIAGMGFFTDAYDLFCISLVTKLLGRIYYTDPASF-----XPGSLPPNIAAAVNGVALCG OsPT12  
1 MAGNQ----QLRVLHALDIARTQLYHFMAI VIAGMGFFTDAYDLFSLSVLADLLGHVYYH-----GELPRNIIHAAVTGIALCG OsPT13  
1 MA-----EQQLGVLKALDVAKTQLYHFMAI VIAGMGFFTDAYDLFCVSLVTKLLGRIYYFNPE SA-----KPGSLPPHVA AVNGVALCG AtPT1

81 TLAGQLFFGWLGD-KLGRKSVYGF TLLMVVCSVASGLSFGSSAKGVVSTLCFFR FFWLGF GIGDYPLSATIMSEYANKRTRGAFIAAVE OsPT1  
81 TLAGQLFFGWLGD-KLGRKSVYGF TLLMVVCSIASGLSFGHTPKSVIATLCFFR FFWLGF GIGDYPLSATIMSEYANKRTRGAFIAAVE OsPT2  
81 TLAGQLFFGWLGD-KLGRKSVYGF TLLMVVCSVASGLSFGRIAKGVVAXLCFFR FFWLGF GIGDYPLSATIMSEYANKRTRGAFIAAVE OsPT3  
80 TLAGQLFFGWLGD-KMGRKKVYGMTI LMLMVICCLASGLSFGSSAKGVMATLCFFR FFWLGF GIGDYPLSATIMSEYANKRTRGAFIAAVE OsPT4  
80 TLAGQLFFGWLGD-KMGRKKVYGMTI LMLMVICCLASGLSFGSSAKGVMATLCFFR FFWLGF GIGDYPLSATIMSEYANKRTRGAFIAAVE OsPT5  
86 TLSGQLFFGWLGD-KLGRKRVYGI TLLMVICSLASALSFGHTPTSVMATLCFFR FFWLGF GIGDYPLSATIMSEYANKRTRGAFIAAVE OsPT6  
81 TLTGQLFFGWLGD-RVGRKSVYGMT LLLMVICSVASGLSFGHTPTSVMATLCFFR FFWLGF GIGDYPLSATIMSEYANKRTRGAFIAAVE OsPT7  
85 TLAGQLFFGWLGD-KLGRKSVYGMT LLMVICSIASGLSFSHTPTSVMATLCFFR FFWLGF GIGDYPLSATIMSEYANKRTRGAFIAAVE OsPT8  
85 AVAGNVVFGALGD-RVGRRRVYGAC LLLMVCSVSGLSVCRXRRCALASLCFFR FFWLGF VGVGGDYPLSATIMSEFANRTRGAFIAAVE OsPT9  
78 AVIGNVVFGALGD-RVGRRRVYGAC LLLML--RRERLLRVPDAPVRRARQPL--LLPFL LGVGVGGDYPLSATIMSEFANRTRGAFIAAVE OsPT10  
87 TLMGQLVFGYFGD-KLGRKRVYGV TLLMAACAIGSGLSFGSSRKA VIGTLCFFR FFWLGF GIGDYPLSATIMSEYSNKKRTRGAFIAAVE OsPT11  
83 TLSGQLFFGWLGD-KLGRKSVYGMT LLLMVICSIASGLSFSHTPTSVMATLCFFR FFWLGF GIGDYPLSATIMSEYANKRTRGAFIAAVE OsPT12  
75 TVPGQLVFGWLGATKWAGSVSMESPSSM VVSSLASGLSF-----IGGDYPLSATIMSEYANKRTRGAFIAAVE OsPT13  
81 TLSGQLFFGWLGD-KLGRKKVYGL TLLVMVICSVASGLSFGHEAKGVMTTLCFFR FFWLGF GIGDYPLSATIMSEYANKRTRGAFIAAVE AtPT1

170 AMQGFGLFCAI VALAVSAGFRHAY PAPSYSNHAASL-VPOADYVWRI ILMFGTVPAA LTYWRM KMPETARYTALIARNAKQAAADMS OsPT1  
170 AMQGFGLFCAI VALIVSAGFRHAY PAPSYAQNPAASL-APQADYTWR LIIMFGTIPAG LTYWRM KMPETARYTALVARNAKQAAADMS OsPT2  
170 AMQGFGLFCAI VALIVSAGFRNAY PAPSADGRAASL-VPEADYVWRI ILMFGTVPAA LTYWRM KMPETARYTALIARNAKQAAADMS OsPT3  
169 AMQGFGNLTGGIVA IIVSAAFKSRFDAPAYRDDRTGST-VPOADYAWRI VLMFGAIPALLTYWRM KMPETARYTALVAKNAKQAAADMT OsPT4  
169 AMQGFGNLTGGIVA IIVSAAFKSRFDAPAYRDDRAXX----ADYAWRI VLMFGAIPALLTYWRM KMPETARYTALVAKNAKQAAADMA OsPT5  
175 AMQGFGITGGVA IIVSAAFRAAFPAPPYGEDPVAST-PPQADYVWRI ILMGALPAALTYWRM KMPETARYTALVANNAKQAAADMS OsPT6  
170 AMQGFGLLAGGAVA IIGITAI FRSRFPAPPFAADPAAST-PPQADYVWRI ILMGALPAALTYWRM KMPETARYTALVAKNAERAAADMS OsPT7  
174 AMQGFGLLAGGIVT LIISSAFRAGFPAPAYQDDRAGST-VRQADYVWRI ILMGAMPALLTYWRM KMPETARYTALVAKNAKQAAADMS OsPT8  
174 SMQGFGLI VSSAVTMAVA AAFDH-----YTGYPALDTP ECA DLAWRI ILMAGAVPAALTYWRM SMPETARYTALVERDVVKATNDIG OsPT9  
164 SMQGFGLI VSSAVTMAVA AAFDH-----YTGYPALDTP ECA DLAWRI ILMAGAVPAALTYWRM SMPETARYTALVERDVVKATNDIG OsPT10  
176 AMQGVGII FAGLVSMIVSSIFLTYNKAPSYKGNHDL SRQMPAADYVWRI VLMIGAFPALATFYWRM KMPETARYTALIDGNAKQAAANDMQ OsPT11  
172 AMQGFGLLAGGVVTLAMSAGFQA AFPAPAYEVNAAAST-VPOADYVWRI ILMGALPAALTYWRM KMPETARYTALVAKDAKQASSDMA OsPT12  
144 AMQGFGLNLAGI IGMIVSAAFKHS-----SASKIDYAWRI ILMFGAIPAA LTYWRM KMPETARYTALISKNAKKAADMS OsPT13  
170 AMQGVGII LAGGFVALAVSSIFDKKFPAPTYAVNRALST-PPQVDYI WRI IVMFGALPAALTYWRM KMPETARYTALVAKNIKQATADMS AtPT1

259 KVLH----TQIEESADRAETVAVGEGS-----WGLFSRQFLRRHGLHL LATTSTWFLLDIAFY S QNLFQKDI FSKVGIWIPPAKTM-- OsPT1  
259 KVLH----AEIEERPEVVESQVAVGET-----WGLFSRQFMKRHGMHL LATTSTWFLLDIAFY S QNLFQKDI FSKVGIWIPPAKTM-- OsPT2  
259 KVLX----TEIQEDXERAEVAAGGAGNE-----WGLFSRQFVRRHGVHL VATTSTWFLLDIAFY S QNLFQKDI FSKVGIWIPPARTM-- OsPT3  
258 QVLN----VEIVEEQEKA-----DEVARREQFGLFSRQFLRRHGRHLLGTTVCWFVLDIAFY S S NLFQKDIYTA VQWL PKADTM-- OsPT4  
255 RVLN----VELVDEQEKA AATAA AEEEEARREQYGLFSRREFARRHGHL L GTTVCWFVLDIAFY S QNLFQKDIYTA VQWL PKADTM-- OsPT5  
264 KVLQ----V-----VEMRNIGNNGGS-----RRPFGLSGFEFVRRHGLHL VGTSA TWLLLDIAFY S QNLFQKDI FSAVGIWIPKAATM-- OsPT6  
259 KVLQ----VKITAEQAEMSPVDPKFFT-----SKPFGLSGFEFARRHGHL L GTTSTWLLLDIAFY S QNLFQKDI FSAIGWIPEAKTM-- OsPT7  
263 KVLQ----VEIQEEQDKLEQMVTRNSSS-----FGLFSRQFARRHGLHL VGTATTWFLLDIAFY S QNLFQKDI FTSINWIPKAKTM-- OsPT8  
258 RVLADLDLAAVAEE EAAAA LSPPPVTPPPRPSYGLFSRREFVRQ HGRDLFACAAA WFLLDIPYSS TLFQSQIYRP--WFPAAKV-- OsPT9  
248 RVLADLDLGAVAEE EAAAA -LSRPP----PPRPSYGLLSRREFVRQ HGRDLFACAAA WFLLDIPYSS TLFQSQIYRP--LFPAPGLI-- OsPT10  
266 KVL S----IEIEAEQEKLAKFNAA-----NNYPLLSMEFARRHGLHL IGT TTTWFLLDIAFY S QNLTQKDI FPA GLISGAEV-- OsPT11  
261 KVLQ----VEIEVEEKLQD-ITR-GRD-----YGLFSARFAKRHGHAL LGTAATWFLVDVAYYSQNLFQKDI FTSIHWIPKARTM-- OsPT12  
220 AVLN----VNI TPDEVI-----NELARQDEYGLFSFEFLHRHGLHL L GTTVCWFVLDVTFYSLNIFMKNIFTEVGLLPRLDSEYH OsPT13  
259 KVLQ----TDIELE-ERVEDDVKDPKQN-----YGLFSKEFLRRHGLHL L GTTSTWFLLDIAFY S QNLFQKDI FSAIGWIWIPKAATM-- AtPT1

335 NALEELYRIARAQALIALCGTIPGYWFTVAFIEIMGRFWIQIMGFAMMTAFMLGLAIPYH-HWTTTPG-HHTGFIIMYMGFTFFFANFGPNS OsPT1  
 335 NALEELYRISRQAALIALCGTIPGYWFTVAFIDIVGRFWIQIMGFMMTVFMLALGVPYD-HWTHFA-HHTGFVVLYALTFFFANFGPNS OsPT2  
 337 NAVEEVFRIARAQALIALCGTIPGYWFTVAFIDVAGRFALQIMGFAMMTVFMGLAAPYH-HWTTTPG-NHTGFVVMYMGFTFFFANFGPNA OsPT3  
 333 SALEEMFKISRQTLVALCGTIPGYWFTVFFIDIIGRFVIQLGGFFMTAFMLGLAVPYH-HWTTTPG-NHIGFVVMYAFFFFANFGPNS OsPT4  
 339 SALEEMFKISRQTLVALCGTIPGYWFTVLFIDIVGRFAIQIGGFLLMTAFMLGLAVPYH-HWTTTPG-NHVGFFVVMYAFFFFANFGPNS OsPT5  
 337 SALEELFRIARAQTLIALCGTIPGYWFTVALIDVGRFKIQAVGFFMMTLFMLTLALPYH-HWTAPGKNHVGFLLLYGLTFFFANFGPNS OsPT6  
 338 SALDELYHIARAQTLIALCGTIPGYWFTVALIDVGRFKIQAGFFVMTAFMLALAVPYD-HWTAAG-NQIGFVVLYALTFFFANFGPNA OsPT7  
 340 SALEEVFRIARAQTLIALCGTIPGYWFTVFLIDIVGRFAIQLLGFFMMTVFMLGLAVPYH-HWTTKG-NHIGFVVMYAFFFFANFGPNS OsPT8  
 344 NAFQEA FNVAKFQAVIAVASTIPGYFAAMLLIERAGRRLQOMAGFLLMAVFLFALAGPYDGYWRDHAK-TAGYIVLYSLTFFSANLGPNT OsPT9  
 329 NAFQEA FNVAKFQAVIAVASTIPGYFVAVLLIDRVGRCLQOMAGFLLMAVFLFALAGPYDGYWRDHGA-HAGYIVLYSLTFFSANLGPNT OsPT10  
 341 NALTEMFQISKASFLVALLGTFPGYWTVVALIDKMGRYMQLIGFFMMSMFMLAMGILYD-YLKT---HIFLFGLLYALTFFFANFGPNS OsPT11  
 336 SELEEVFRISRQTLIALCGTIPGYWFTVFLIDIIGRFKIQLLGFAGMTAFMLGLAIPYH-HWTPMG-NQVIFVFLYGFFFFANFGPNA OsPT12  
 297 HTLQRMITMTAVHTFISLCCALPGYFFTVAFVDRIGRVKIQLLIGFTMMTVFMLCLAI PYD-QWL-RHKNKYGFVVMYGLTFFFANFGPNT OsPT13  
 335 NATHEVFRIARAQTLIALCSTVPGYWFTVAFIDTIGRFKIQNGFFMMTVFMFAIAFPYN-HWIKFE-NRIGFVVMYSLTFFFANFGPNA AtPT1

423 TTFIVPAE IYPARLRSTCHGISAAAGKAGAIIGAFGFLYAAQDQHKP--EP-GYPRGI-GIKNALFVLAGTNFLGTIMT-LLVPESKGMS OsPT1  
 423 TTFIVPAE IYPARLRSTCHGISAAAGKAGAIIGAFGFLYAAQDQHNP--DA-GYSRGI-GIRNALFVLAGTNFLGMLMT-LLVPESKGLS OsPT2  
 425 TTFIVPAE IYPARLRSTCHGISAAAGKAGAI V GAFGFLYAAQDPHKP--EA-GYKPGI-GIRNALFVLAGTXFLGMLMT-LLVPESKGMS OsPT3  
 421 TTFIVPAE IYPARLRSTCHGISAAAGKAGAI VGSFGFLYAAQSDASKTDA-GYPPGI-GVRNSLFFLAGCNVIGFFFTF-LVPESKGKS OsPT4  
 427 TTFIVPAE IYPARLRSTCHGISAAAGKAGAI VGSFGFLYAAQSDPSKTDA-GYPRGI-GVRNSLFFLAGCNVVGFLFTF-LVPESKGKS OsPT5  
 426 TTFIVPAE IYPARLRSTCHGISAAAGKAGAI VGSFGFLYLAQSPDRSKTE-HGYPPGI-GVRNSLFFLAGCNLLGLLFTF-LVPESKGKS OsPT6  
 426 TTFIVPAE IYPARLRSTCHGISAAAGKAGAI VGSFGFLYLAQSPVPAKAAAHGYPPGI-GVRNSLFFLAGCNLLGLLFTF-LVPESKGKS OsPT7  
 428 TTFIVPAE IYPARLRSTCHGISAAAGKAGAIIGSFGFLYAAQDPHKP--DA-GYKPGI-GVRNSLFFLAGCNLLGLICTF-LVPESKGKS OsPT8  
 433 TTFILPAELFPARFRSTCHGLSGAAGKLGALVSGIFLWASQQKDG---AAGHLPGI-GMMYALFVLGGICLLGLALTYAFTPETMTRS OsPT9  
 418 TTFILPAELFPARFRSTCHGLSGAAGKLGALVSGIFLWASQQKDG---AAGHLPGI-GMMYALFVLGGICLLGLALTYVFTPETMTRS OsPT10  
 427 TTFVLP AELFPTRVRSTCHASAAAGKAGAI VAAF-----IQKLTNSQVKSIIKAI ILSITNMLGFFFTF-LVPETMGRS OsPT11  
 424 TTFIVPAE IYPARLRSTCHGISAAAGKAGAIIGAFGFLYAAQPDKAHVDA-GYKPGI-GVRNALFVLGCNLVGFIMTWMLVPESKGKS OsPT12  
 385 TTFIIPAE IYPARLRSTCHGISGAVGKIGAI VGVFGFLYTE-----YH-----IRIFLFLVLI GCNLVGFIFTL-LVPESKGKS OsPT13  
 423 TTFIVPAE IYPARLRSTCHGISAAAGKAGAI V GAFGFLYAAQSQDKAKVDA-GYPPGI-GVKNSLIMLGVNFI GMLFTF-LVPEPKGKS AtPT1

508 LEV----ISQEVADGDDEEAAYPK OsPT1  
 508 LEE----MSKDNVDETAQEAIAQA OsPT2  
 510 LEE----VSKENVADDEEATA OsPT3  
 508 LEE----LSGENEDDDVPEAPATADHRTAPAP--PA OsPT4  
 514 LEE----LSGENEMEA E-PAATNSYRQTV PDSQSE OsPT5  
 513 LEE----MSGDAEAQE EAP-----PPLQTVL OsPT6  
 514 LEE----MSRENEVGQP OsPT7  
 513 LEE----MSGEAEDDDD-EVAAAGGGAAVRP---QTA OsPT8  
 519 LEENESSVQAQSQVGGSDAGNGSDGLRFHELNLVMEATKSPVSMASHLSMSPILPHRMSL OsPT9  
 504 LEENESD-RAQTQVGGSDTE-----AAKSPASMASHLSMSPILPARVSV OsPT10  
 504 LEE----ISGEDGNTGAGGGGAPAAANAGVGV SASDVS RDEKFPASSTEWQTSMH-----A OsPT11  
 512 LEE----MSGEA--DDE-EASANGGATAVNSSGVEMV OsPT12  
 457 LED----LTGEIEEFQEEDEGSEVALSRPIHT-----VP-----L OsPT13  
 510 LEE----LSGAEVSHD-EK AtPT1
