# Supplementary material
Source: PubMed Central journal article supplement (PMC130632)

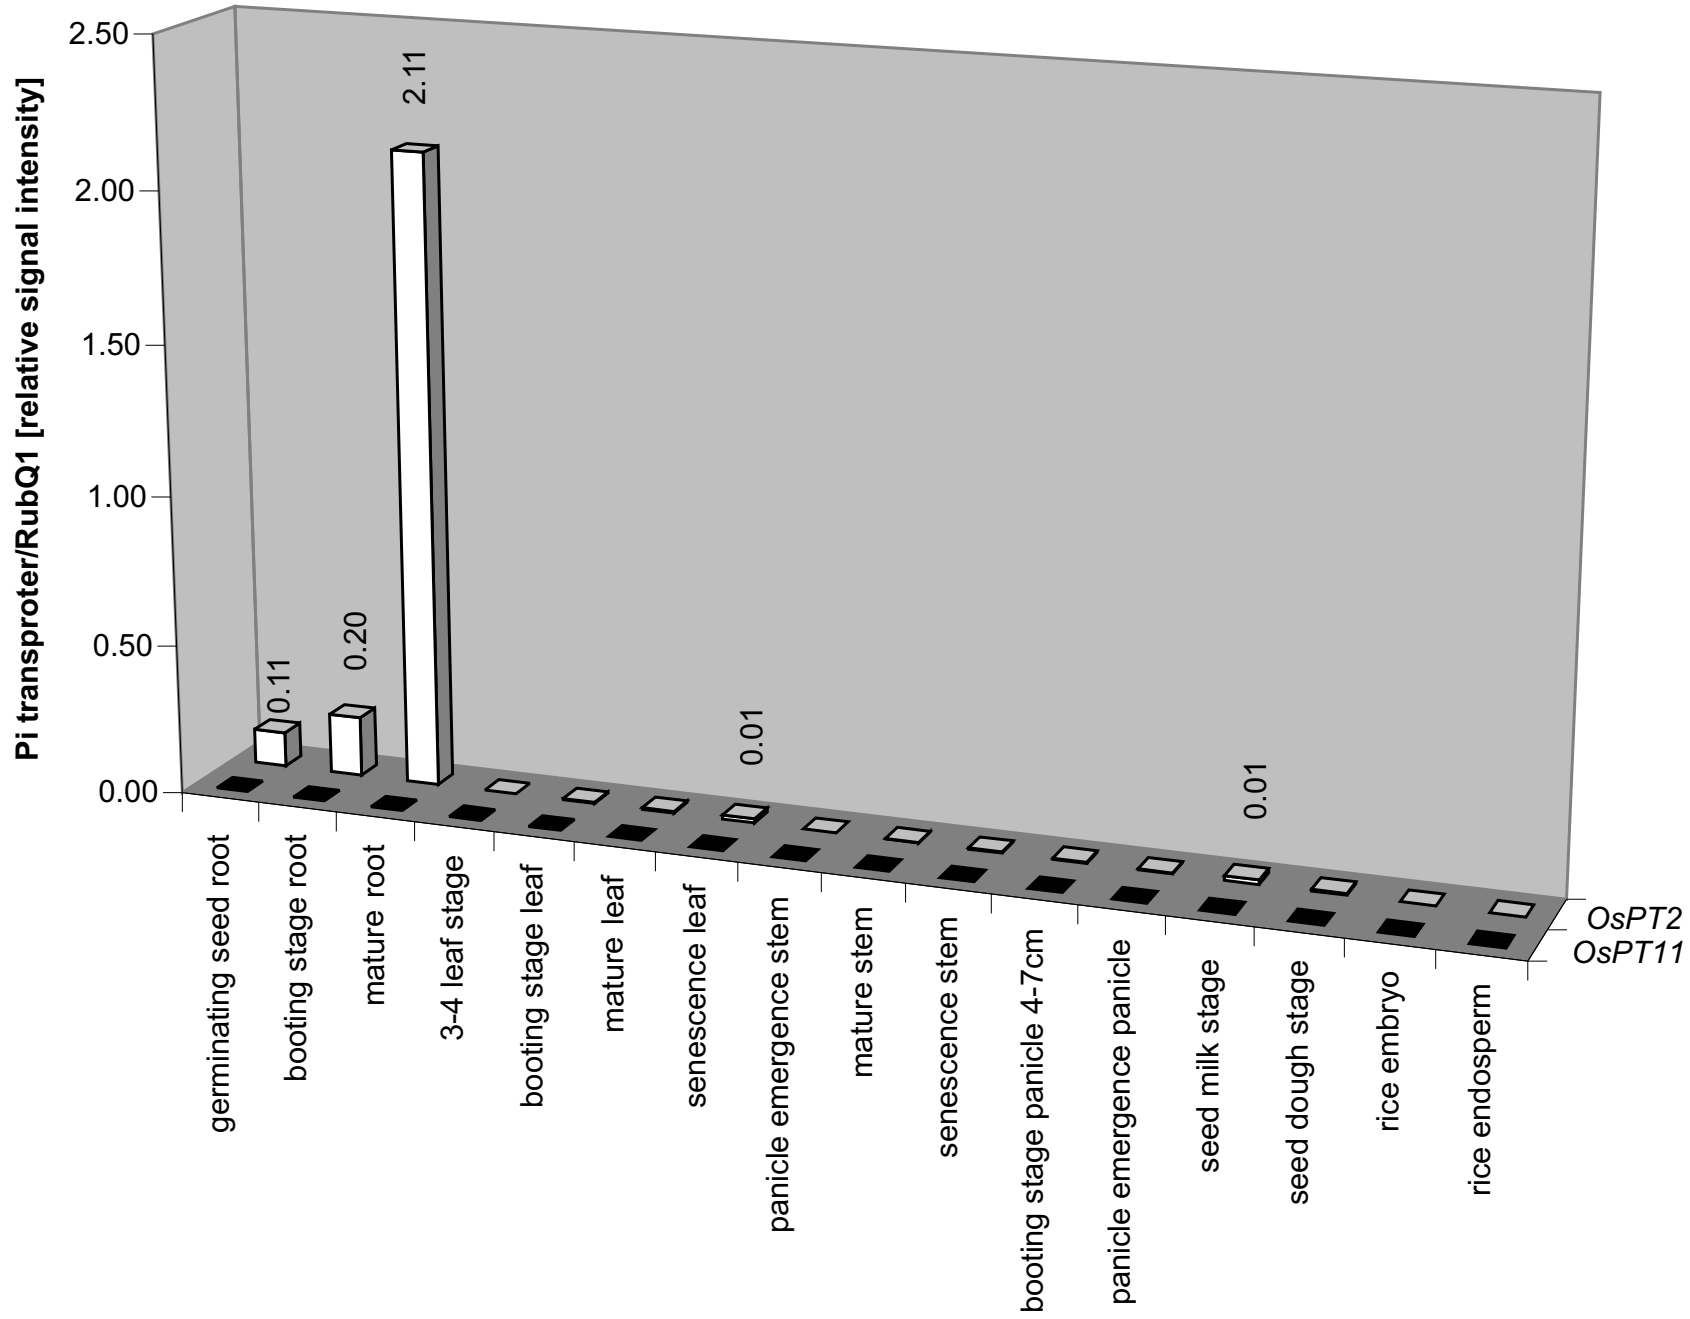

Supplement: pnas_202474599_5.pdf [file pnas_202474599_5.pdf]
